# Supplementary material for: IL-17R–EGFR axis links wound healing to tumorigenesis in Lrig1+ stem cells
Source: PubMed Central journal article supplement — J Exp Med. 2019 Jan 7;216(1):195–214. doi: 10.1084/jem.20171849 (PMC6314525; doi:10.1084/jem.20171849), 2019-01-07
Supplement: JEM_20171849_sm.pdf [file JEM_20171849_sm.pdf]

## Supplemental material

Chen et al., <https://doi.org/10.1084/jem.20171849>

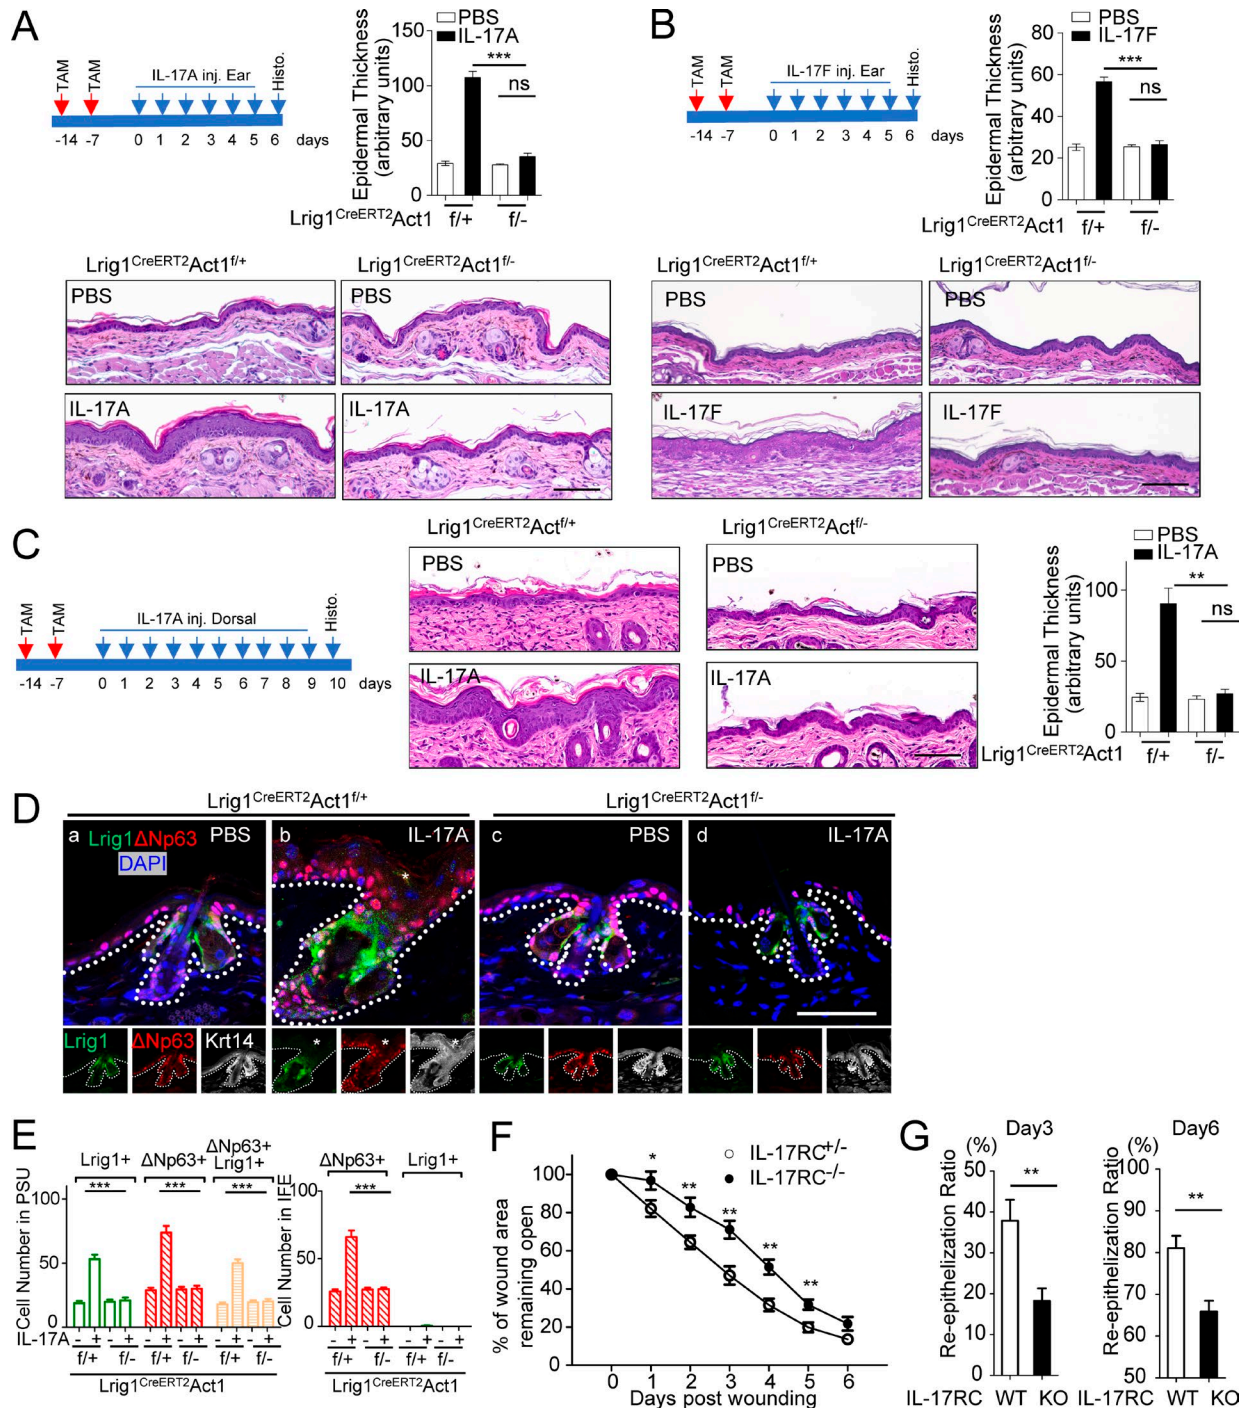

**Figure S1. IL-17A-induced signaling in epidermal hyperplasia and wound healing.** (A and B) H&E staining of ear skin tissue from *Lrig1<sup>CreERT2</sup>Act1<sup>f/+</sup>* and *Lrig1<sup>CreERT2</sup>Act1<sup>f/-</sup>* mice injected intradermally with IL-17A (500 ng; A), IL-17F (1 μg; B), or PBS daily for 6 consecutive d. Mice were intraperitoneally injected with two doses of tamoxifen (~5 mg/25 g weight) 14 and 7 d before IL-17A (A) or IL-17F (B) injection. *n* = 5 per group. Graph shows mean epidermal thickness (arbitrary units) ± SEM (five fields were analyzed; \*\*\*, *P* < 0.001; ns, not significant, *t* test). Bar, 100 μm. (C) H&E staining of dorsal skin from of *Lrig1<sup>CreERT2</sup>Act1<sup>f/+</sup>* and *Lrig1<sup>CreERT2</sup>Act1<sup>f/-</sup>* mice that were subjected to multipoint dorsal intradermal injection of with IL-17A (1.25 μg each spot, six spots) or PBS daily for 10 consecutive d. Mice were injected with two doses of tamoxifen (~5 mg/25 g weight) 14 and 7 d before IL-17A injection. Graph presents mean epidermal thickness (arbitrary units) ± SEM (five fields were analyzed; \*\*, *P* < 0.001, *t* test). Bars, 100 μm. Data are representative of three independent experiments shown in A–C. (D) Sections of PBS (a and c) and IL-17A-injected ears (b and d; day 6) of indicated genotypes from Fig. 1A were stained for Lrig1<sup>+</sup> (green) and ΔNp63 (red). The asterisk indicates nonspecific staining of the stratum corneum. (E) Quantification of Lrig1<sup>+</sup>, ΔNp63<sup>+</sup>, and Lrig1<sup>+</sup>ΔNp63<sup>+</sup> in 10 PSUs and adjacent IFE. *n* = 5 mice per group. Bar graphs show ± SEM. \*\*\*, *P* < 0.001, *t* test. (F) Wound-closure kinetics in IL-17RC<sup>+/-</sup> and littermate IL-17RC<sup>-/-</sup> mice. Graph represents the percentage of wound area remaining open ± SEM from four mice. \*, *P* < 0.01; \*\*, *P* < 0.05, *t* test. Data are representative of three independent experiments. (G) Measurement of reepithelization ratio (leading edge ratio) in wound area at day 6 of IL-17RC<sup>+/-</sup> (WT) and littermate IL-17RC<sup>-/-</sup> (KO) mice, ± SEM from 3 sections of each wound and total 10 wounds. \*\*, *P* < 0.01, *t* test. Data are representative of three independent experiments.

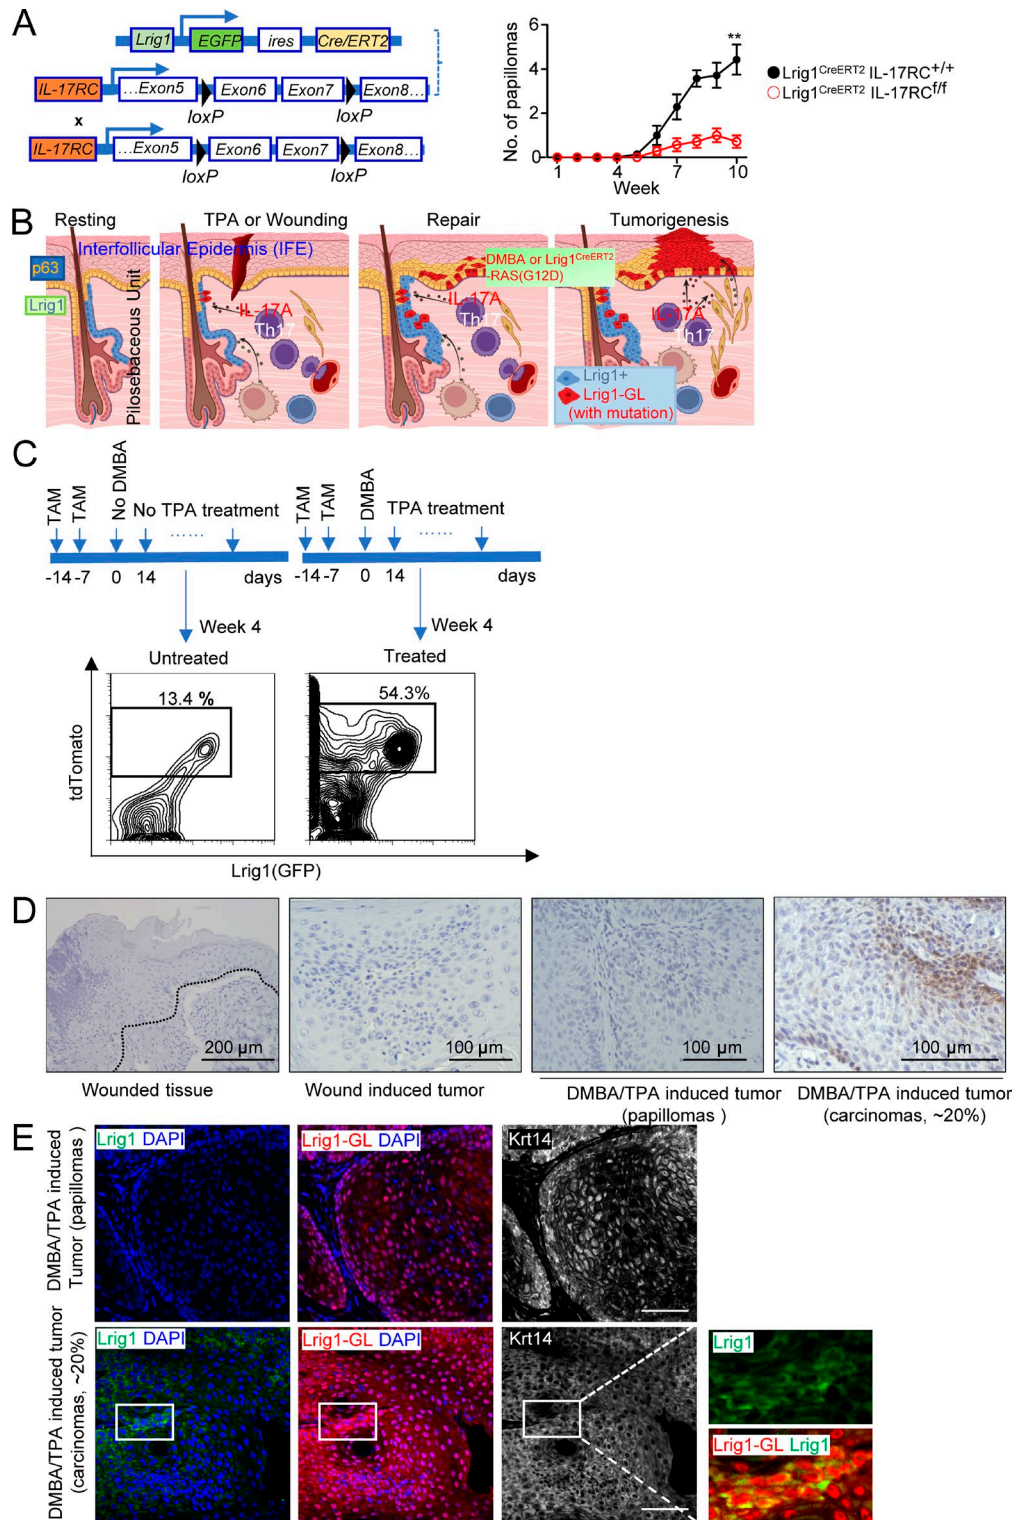

Figure S2. **IL-17A-induced signaling in *Lrig1*<sup>+</sup> cells drives *Lrig1* progenies to participate in skin tumorigenesis.** (A) DMBA/TPA-induced tumor/papilloma numbers in *Lrig1*<sup>CreERT2</sup>IL-17RC<sup>+/+</sup> and *Lrig1*<sup>CreERT2</sup>IL-17RC<sup>fl/fl</sup> mice. Mice were injected with tamoxifen (~5 mg/25 g weight) 7 and 14 d before DMBA/TPA treatment. *n* = 7 per group. The data are presented as average tumor numbers per mouse ± SEM. \*\*, *P* < 0.01, *t* test. Data are representative of two independent experiments. *Lrig1*<sup>CreERT2</sup>IL-17RC<sup>fl/fl</sup> mice were obtained after at least eight generations of breeding. (B) Model for IL-17A-dependent wound healing and skin tumorigenesis. (C) Epidermal cells from DMBA/TPA-treated dorsal skin were analyzed by flow cytometry for GFP and tdTomato. Data are representative of two independent experiments. TAM, tamoxifen. (D) Paraffin sections of the wound tissue, wound-induced tumors (Fig. 3 A), and DMBA/TPA-induced tumor were subjected of DAB staining for Lrig1 (AF3688; R&D Systems); in ~20% tumor tissue induced by the DMBA/TPA model; Fig. 3 K). The epithelial border was indicated by Krt14 staining. Bars, 50 μm. For D and E, data are representative of at least five specimens for each experiment and were verified in three independent experiments.





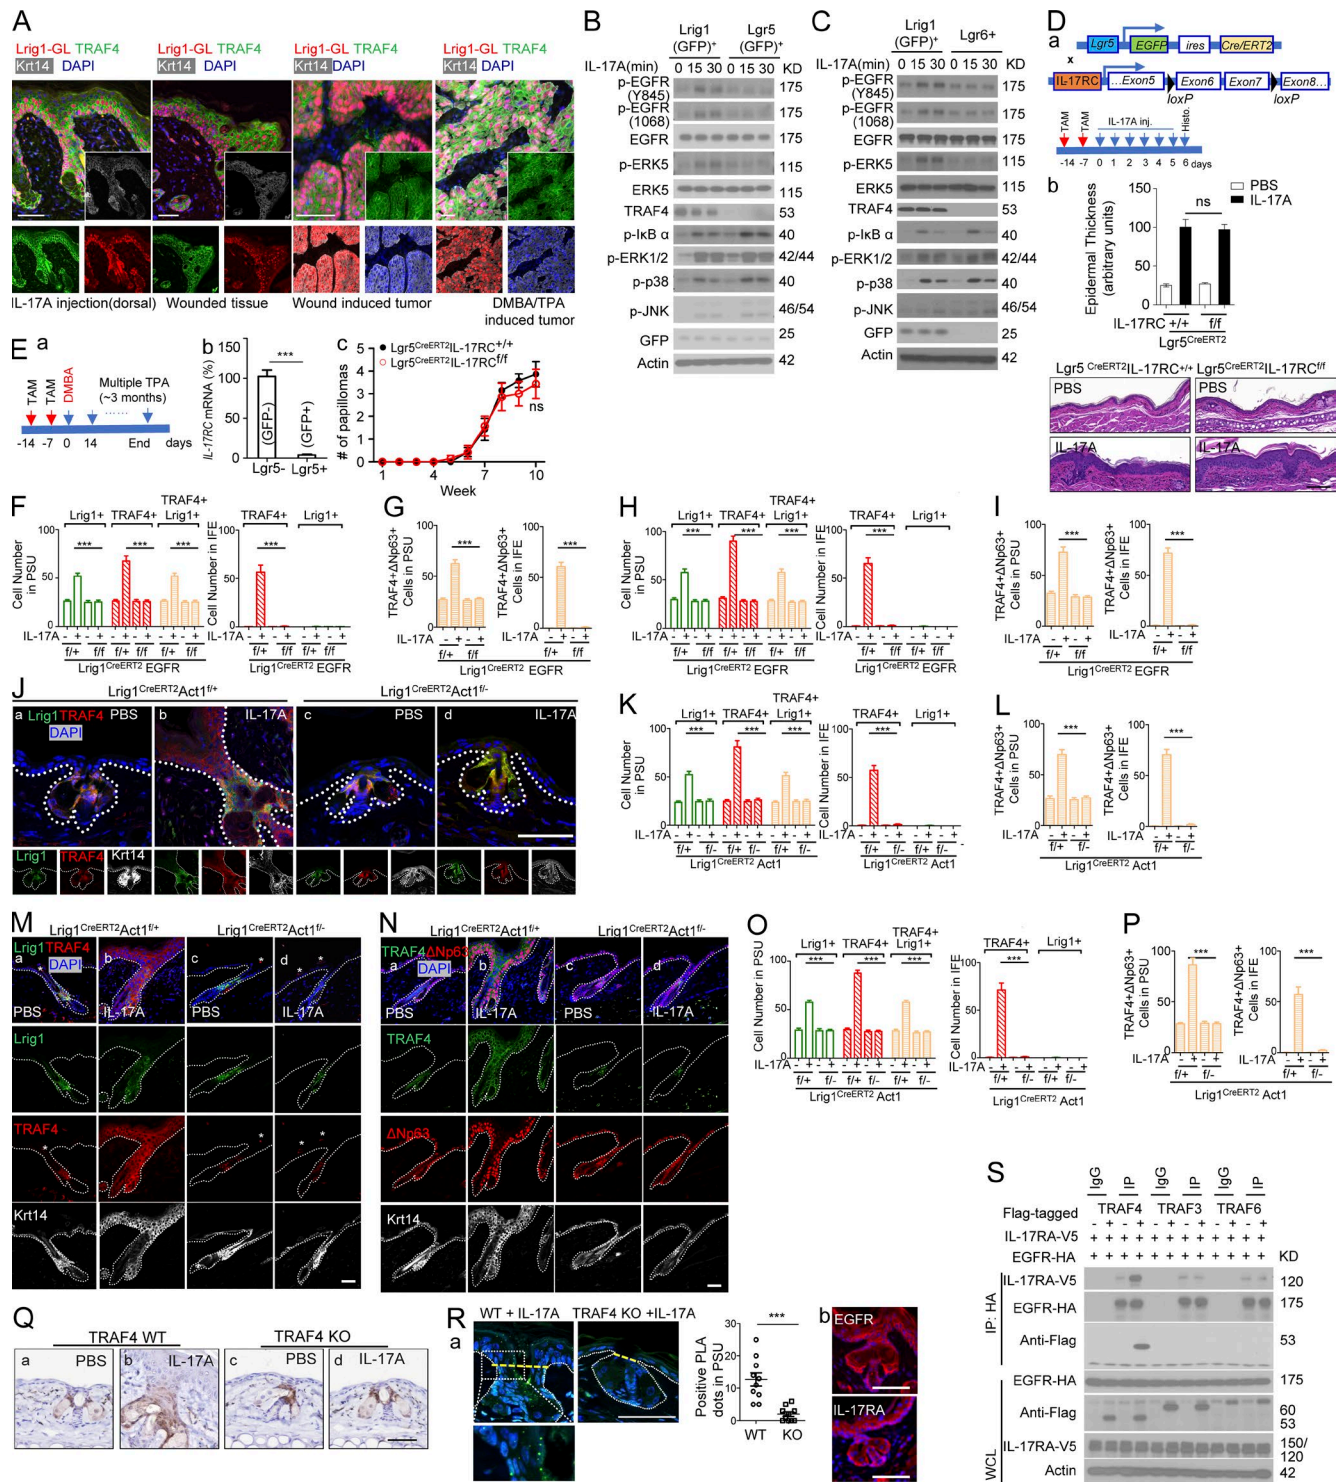

**Figure S4. TRAF4 is enriched in Lrig1<sup>+</sup> stem cells and required for IL-17A-induced IL-17RA-EGFR interaction.** (A) Paraffin sections of the IL-17A-injected dorsal skin (day 10), wounded tissue (day 3), wound-induced tumors, and DMBA/TPA-induced tumor were subjected to staining for Lrig1-Gl(tdTomato) and TRAF4. Bars, 50 μm. Data are representative of at least five specimens for each experiment and were verified in three independent experiments. (B) Primary Lrig1(GFP)<sup>+</sup> and Lgr5(GFP)<sup>+</sup> keratinocytes from Lrig1<sup>CreERT2</sup> and Lgr5<sup>CreERT2</sup> reporter mice were isolated and sorted by FACS, followed by 100 ng/ml IL-17A stimulation and Western blot analyses with the indicated antibodies. (C) Primary Lrig1(GFP)<sup>+</sup> and Lgr6<sup>+</sup> keratinocytes from Lrig1<sup>CreERT2</sup> reporter mice were isolated and sorted by FACS, followed by 100 ng/ml IL-17A stimulation and Western blot analyses with the indicated antibodies. Data are representative of three independent experiments shown in B and C. (D) Schematic representation of the genetic elements for Lgr5 reporter, IL-17RC deletion, and the experimental setup (a). Lgr5<sup>CreERT2</sup>IL-17RC<sup>+/+</sup> and Lgr5<sup>CreERT2</sup>IL-17RC<sup>fl/fl</sup> littermate mice were intraperitoneally injected with tamoxifen (~5 mg/25 g weight) before intradermal IL-17A injection. IL-17A (500 ng) or PBS were injected daily for 6 consecutive d. H&E staining of ear skin tissue (b). Graph presents mean epidermal thickness (arbitrary units) ± SEM (five fields were analyzed; ns, not significant, t test). Bar, 100 μm. Data are representative of three independent experiments. TAM, tamoxifen. (E) DMBA/TPA-induced tumor/papilloma numbers in Lgr5<sup>CreERT2</sup>IL-17RC<sup>+/+</sup> and Lgr5<sup>CreERT2</sup>IL-17RC<sup>fl/fl</sup> mice. Mice were injected with

tamoxifen (~5 mg/25 g weight) 7 and 14 d before DMBA/TPA treatment (a). IL-17RC deletion in Lgr5<sup>+</sup> cell was determined by qPCR analysis of *IL-17RC* mRNA level in flow cytometry-sorted epidermal cells from Lgr5<sup>CreERT2</sup>IL-17RC<sup>fl/fl</sup> littermate mice before DMBA application (day 0; b) as shown in a. Primers targeting *IL-17RC* mRNA sequence encoding Exon 6–7 were used. Forward, 5'-GTTTCGAGGCTAGTCTTGGGG-3'; reverse, 5'-GAGCTCTTCTGGTACCTGGG-3'. Graph presents relative mRNA change ± SEM from three biological replicates. \*\*\*,  $P < 0.001$ ,  $t$  test. The data are presented as average tumors numbers per mice ± SEM (c).  $n = 7$  per group. ns, not significant,  $t$  test. Data are representative of two independent experiments. **(F and G)** Quantification of Lrig1<sup>+</sup>, TRAF4<sup>+</sup>, Lrig1<sup>+</sup> TRAF4<sup>+</sup>, or TRAF4<sup>+</sup>ΔNp63<sup>+</sup> in the PSU and IFE for the data presented in Fig. 6 D (a–d) and Fig. 6 E (a–d). **(H and I)** Quantification of Lrig1<sup>+</sup>, TRAF4<sup>+</sup>, Lrig1<sup>+</sup> TRAF4<sup>+</sup>, or TRAF4<sup>+</sup>ΔNp63<sup>+</sup> in the PSU and IFE for the data presented in Fig. 6 D (e–h) and Fig. 6 E (e–h). For F–I, 10 PSUs and adjacent IFE were analyzed. Five mice were analyzed for each genotype (±SEM; \*\*\*,  $P < 0.001$ ,  $t$  test). Data are representative of three independent experiments. **(J)** Paraffin sections described in Fig. S1 D (a–d) were subjected to double staining of Lrig1 (anti-GFP; green) and TRAF4 (red; a–d). Bars, 50 μm. **(K)** Quantification of Lrig1<sup>+</sup>, TRAF4<sup>+</sup>, and Lrig1<sup>+</sup> TRAF4<sup>+</sup> in the PSU and IFE for the data presented in J (10 PSUs and adjacent IFE were analyzed; ±SEM; \*\*\*,  $P < 0.001$ ,  $t$  test). **(L)** Quantification of TRAF4<sup>+</sup>ΔNp63<sup>+</sup> from paraffin section staining described in Fig. S1 D (a–d); 10 PSUs and adjacent IFE were analyzed each section; ±SEM; \*\*\*,  $P < 0.001$ ,  $t$  test). **(M–P)** Dorsal skin sections from indicated littermate mice were stained for Lrig1 (GFP; green) and TRAF4 (red; M, a–d) or TRAF4 (green) and p63 (ΔNp63; red; N, a–d). Bars, 50 μm. The asterisk indicates nonspecific staining of the stratum corneum. 10 PSUs and adjacent IFE were analyzed for O and P. ±SEM; \*\*\*,  $P < 0.001$ ,  $t$  test. Five mice were analyzed for each genotype. Data are representative of three independent experiments. **(Q)** Ear skin sections from TRAF4<sup>+/+</sup> and TRAF4<sup>-/-</sup> littermate mice injected with PBS (a and c) or IL-17A (500 ng; b and d) daily for 6 consecutive d were subjected to staining of Lrig1 (AF3688; R&D). Data are representative from at least five mice for each experiment and were verified in three independent experiments. **(R)** Ear skin sections from TRAF4 WT and TRAF4 KO littermate mice injected with IL-17A (500 ng) daily for 6 consecutive d were subjected to PLA (a). Mouse anti-EGFR (Thermo Fisher Scientific) and rabbit anti-IL-17RA antibodies (Covance) were used for the assay. Green dots present the interaction between EGFR and IL-17RA. Graph represents mean of positive dots from 10 PSUs (outlined by yellow dashed line). ±SEM; \*\*\*,  $P < 0.001$ ,  $t$  test. Bar, 50 μm. Data are representative of three independent experiments. Immunofluorescence staining of ear skin tissue for EGFR and IL-17RA with the antibodies used in the PLA (b). Monovalent Fab fragment of donkey anti-mouse IgG was used to block endogenous IgG before EGFR antibody incubation. Bar, 50 μm. **(S)** Flag-tagged TRAF4, TRAF3, or TRAF6 were cotransfected with V5-tagged IL-17RA and HA-tagged EGFR into HeLa cells. Cell lysates were immunoprecipitated with mouse anti-HA (EGFR), followed by Western blot analyses with the indicated antibodies. Data are representative of three independent experiments. WCL, whole cell lysate; IP, immunoprecipitation.



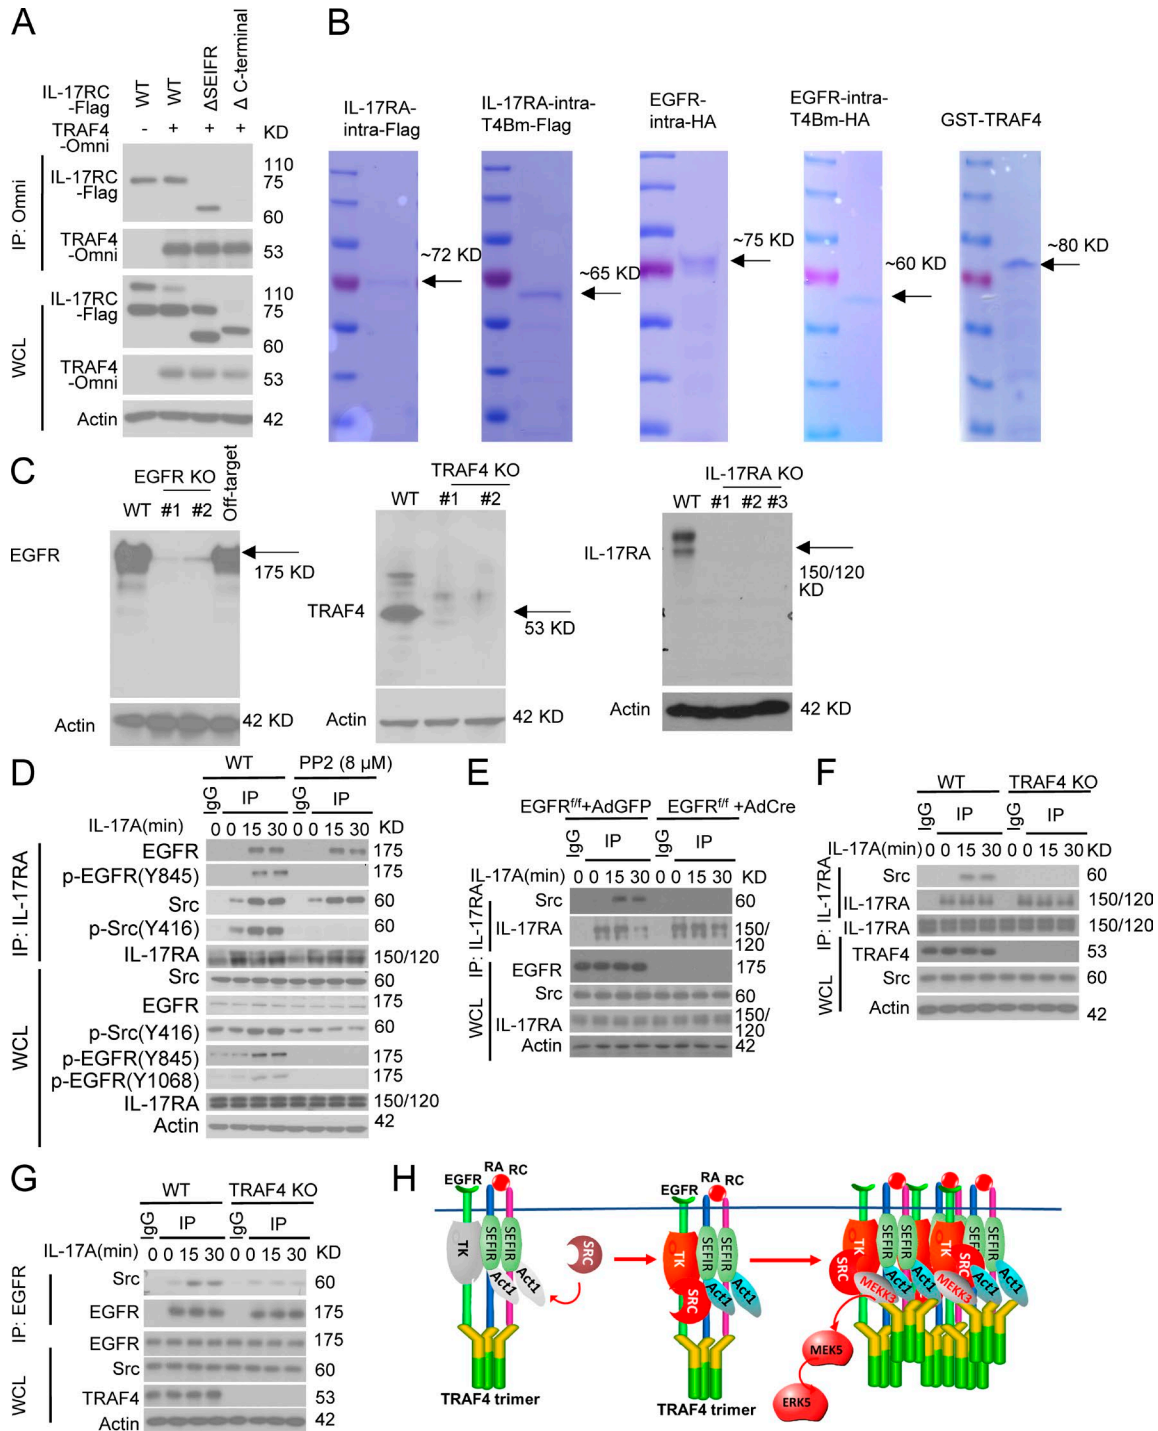

Figure S5. **IL-17R-EGFR transactivation.** (A) Omni-tagged TRAF4 was cotransfected with the indicated Flag-tagged IL-17RC mutants into IL-17RA KO HeLa cells. Cell lysates were immunoprecipitated with anti-Omni (TRAF4), followed by Western blot analysis. Data are representative of at least three experiments. (B) Coomassie blue staining of SDS-PAGE resolved recombinant IL-17RA and EGFR protein used in Fig. 8 (K and L). (C) Western analysis of EGFR, IL-17RA, and TRAF4 KO clones derived from HeLa cells. Rabbit anti-EGFR (Abcam), rabbit anti-human IL-17RA (Cell Signaling Technology), and goat anti-TRAF4 (Santa Cruz Biotechnology) antibodies were used. Data were verified in three independent experiments. (D) Primary keratinocytes with and without pretreatment of Src inhibitor (PP2, 8 μM; 30 min) were then treated with 100 ng/ml IL-17A for the indicated times. Cell lysates were then immunoprecipitated with anti-mouse-IL-17RA followed by Western blot analysis with the indicated antibodies. (E) Primary keratinocytes were isolated from EGFR<sup>fl/fl</sup> mice, followed by infection with adenovirus containing Cre-recombinase (AdCre) or empty vector (AdGFP). Cell lysates were then immunoprecipitated with anti-mouse-IL-17RA followed by Western blot analysis with the indicated antibodies. (F and G) Primary keratinocytes were isolated from TRAF4 WT and TRAF4 KO littermate mice. Cell lysates were then immunoprecipitated with anti-mouse-IL-17RA (F) and anti-EGFR (G) followed by Western analysis with the indicated antibodies. For D–G, data are representative of at least three experiments. WCL, whole cell lysate; IP, immunoprecipitation. (H) Model for IL-17R-EGFR-induced ERK5 activation. In response to IL-17A stimulation, TRAF4 tethers IL-17R and EGFR, which allows Act1 to recruit c-Src to the IL-17R-EGFR complex. The activated c-Src mediates EGFR transactivation followed by downstream activation of MEKK3-ERK5.

Table S1. **Key antibodies and reagents**

| <b>Antibodies and reagents</b>                                                   | <b>Source</b>                                                  | <b>Identifier</b>                  |
|----------------------------------------------------------------------------------|----------------------------------------------------------------|------------------------------------|
| Rat anti-humanAct1                                                               | eBioscience (1:1,000 for WB)                                   | Cat. no. 14-4040-80, Clone: 9ACT12 |
| Rabbit anti-mouseAct1                                                            | (1:2,000 for WB)                                               | <a href="#">Zhang et al., 2014</a> |
| Rabbit anti-Act1                                                                 | Santa Cruz Biotechnology (1:200 for IP)                        | Cat. no. sc-11444                  |
| Mouse anti-Flag tag                                                              | Sigma-Aldrich (1:150 for staining; 1: 3,000 for WB)            | Cat. no. F3165                     |
| Rabbit anti-Flag tag                                                             | Cell Signaling Technology (1:150 for staining; 1:1,000 for WB) | Cat. no. 14793                     |
| Mouse anti-HA tag                                                                | Sigma-Aldrich (1:150 for staining; 1:3,000 for WB)             | Cat. no. H9658                     |
| Rabbit anti-HA tag                                                               | Cell Signaling Technology (1:150 for staining; 1:1,000 for WB) | Cat. no. 3724                      |
| Rabbit anti-myc tag                                                              | Cell Signaling Technology (1:150 for staining)                 | Cat. no. 2278                      |
| Mouse anti-V5 tag                                                                | Thermo Fisher Scientific (1:500 for IP)                        | Cat. no. R960-25                   |
| Rabbit anti-V5 tag                                                               | Cell Signaling Technology (1:1,000 for WB)                     | Cat. no. 13202                     |
| Mouse anti-Omni-tag                                                              | Santa Cruz Biotechnology (1:1,000 for WB)                      | Cat. no. sc-7270                   |
| Rabbit anti-Omni-tag                                                             | Santa Cruz Biotechnology (1:1,000 for WB; 1 µg/ml for IP)      | Cat. no. sc-499                    |
| Rabbit anti-ΔNp63                                                                | BioLegend (1:300 for staining)                                 | Cat. no. 619001                    |
| Rabbit anti-GFP                                                                  | Cell Signaling Technology (1:100 for staining, 1:1,000 for WB) | Cat. no. 2956                      |
| Mouse anti-GFP                                                                   | Cell Signaling Technology (1:100 for staining)                 | Cat. no. 2955                      |
| Cytokeratin 14 Antibody (LL002) Alexa Fluor 647                                  | Santa Cruz Biotechnology (1:50 for staining)                   | Cat. no. sc-58724 AF647            |
| Rat anti-tdTomato                                                                | Kerafast (1:100 for staining)                                  | Cat. no. EST203                    |
| Rabbit anti-tdTomato (labeled with Thermo Alexa Fluor 568 Antibody Labeling Kit) | Rockland                                                       | Cat. no. 600-401-379               |
| Rabbit anti-Ki67                                                                 | Abcam (1:150 for staining)                                     | Cat. no. ab15580                   |
| Rabbit anti-Krt14                                                                | Biolegend (1:1,000 for staining)                               | Cat. no. PRB-155P                  |
| Goat anti-TRAF4                                                                  | Santa Cruz Biotechnology (1:250 for staining)                  | Cat. no. sc-1920                   |
| Rabbit anti-EGFR                                                                 | Bethyl Laboratories (1:300 for staining)                       | Cat. no. IHC-00005                 |
| Rabbit anti-EGFR                                                                 | Abcam (1:1,000 for WB; 1:200 for IP)                           | Cat. no. ab52894                   |
| Mouse anti-EGFR                                                                  | Thermo Fisher Scientific (1:50 for in situ PLA assay)          | MA5-13070, Clone H11               |
| Rabbit anti-KrasG12D                                                             | Cell Signaling Technology (1:1,000 for WB)                     | Cat. no. 14429                     |
| Rabbit anti-Kras                                                                 | Cell Signaling Technology (1:1,000 for WB)                     | Cat. no. 8955                      |
| Rabbit anti-pEGFR (Y845)                                                         | Cell Signaling Technology (1:1,000 for WB)                     | Cat. no. 6963                      |
| Rabbit anti-pEGFR (Y1068)                                                        | Cell Signaling Technology (1:1,000 for WB)                     | Cat. no. 3777                      |
| Rabbit anti-pSrc (Y416)                                                          | Cell Signaling Technology (1:1,000 for WB)                     | Cat. no. 6943                      |
| Rabbit anti-Src                                                                  | Cell Signaling Technology (1:1,000 for WB)                     | Cat. no. 2108                      |
| Rabbit anti-pp38                                                                 | Cell Signaling Technology (1:1,000 for WB)                     | Cat. no. 9211                      |
| Rabbit anti-pJNK                                                                 | Cell Signaling Technology (1:1,000 for WB)                     | Cat. no. 9251                      |
| Mouse anti-pERK1/2                                                               | Santa Cruz Biotechnology (1:1,000 for WB)                      | Cat. no. sc-7383                   |
| Goat anti-mouse Lrig1                                                            | R&D Systems (10 µg/ml for staining)                            | Cat. no. AF3688                    |
| Rabbit anti-Lgr6                                                                 | Proteintech (0.4 µg per million cells)                         | Cat. no. 17658-1-AP                |
| Mouse anti-Phosphotyrosine                                                       | EMD Millipore (1:1,000 for WB)                                 | Cat. no. 05-321, Clone 4G10        |
| Mouse anti-MEKK3                                                                 | BD Biosciences (1:200 for IP)                                  | Cat. no. 611102, Clone 40          |
| Rabbit anti-plkBα                                                                | Cell Signaling Technology (1:1,000 for WB)                     | Cat. no. 2859                      |
| Rabbit anti-ERK5                                                                 | Cell Signaling Technology (1:1,000 for WB)                     | Cat. no. 3372                      |
| Rabbit anti-IL-17RA (human only)                                                 | Cell Signaling Technology (1:1,000 for WB)                     | Cat. no. 12661                     |
| Rabbit-anti-CD34                                                                 | Abcam (1:100 for IF)                                           | Cat. no. Ab81289                   |
| Rabbit anti-Sox2                                                                 | Abcam (1:100 for IF)                                           | Cat. no. Ab92494                   |
| Goat anti-Actin                                                                  | Santa Cruz Biotechnology (1:1,000 for WB)                      | Cat. no. sc-1615                   |



Table S1. **Key antibodies and reagents (Continued)**

| Antibodies and reagents                    | Source                                               | Identifier           |
|--------------------------------------------|------------------------------------------------------|----------------------|
| Mouse anti-Actin                           | Cell Signaling Technology (1:5,000 for WB)           | Cat. no. 3700        |
| Anti-Rabbit IgG HRP- TrueBlot              | Rockland Immunochemicals (1:2,000 for WB after IP)   | Cat. no. 18-8816-31  |
| Anti-Mouse IgG HRP-TrueBlot                | Rockland Immunochemicals I (1:2,000 for WB after IP) | Cat. no. 18-8817-31  |
| Goat Anti-Mouse IgG, Light Chain HRP       | Jackson ImmunoResearch (1:5,000 for WB after IP)     | Cat. no. 115-035-174 |
| Mouse Anti-Rabbit IgG, Light Chain HRP     | Jackson ImmunoResearch (1:5,000 for WB after IP)     | Cat. no. 211-032-171 |
| TPA                                        | LC Laboratories                                      | Cat. no. P-1680      |
| DMBA                                       | Sigma-Aldrich                                        | Cat. no. D3254       |
| Tamoxifen                                  | Sigma-Aldrich                                        | Cat. no. T5648       |
| 4-hydroxytamoxifen                         | Sigma-Aldrich                                        | Cat. no. H7904       |
| pp2                                        | Sigma-Aldrich                                        | Cat. no. 529573      |
| Gefitinib                                  | Selleck                                              | Cat. no. S1025       |
| XMD8-92                                    | Apexbio                                              | Cat. no. A3943       |
| mIL-17A (in vitro cell culture)            | R&D Systems                                          | Cat. no. 421-ML      |
| mIL-17A (in vivo)                          | R&D Systems                                          | Cat. no. 421-ML/CF   |
| mIL-17F (in vitro cell culture)            | R&D Systems                                          | Cat. no. 2057-IL     |
| mIL-17F (in vivo)                          | R&D Systems                                          | Cat. no. 2057-IL/CF  |
| hIL-17A (in vitro cell culture)            | R&D Systems                                          | Cat. no. 317-ILB     |
| Doxycycline                                | Sigma-Aldrich                                        | Cat. no. D9891       |
| Protease Inhibitor Cocktail                | Sigma-Aldrich (from Roche)                           | Cat. no. 11836170001 |
| Proximity ligation (Duolink) assay (Green) | Duolink in situ Green kit (Sigma-Aldrich)            | Cat. no. DUO92014    |
| Proximity ligation (Duolink) assay (Red)   | Duolink in situ Red kit (Sigma-Aldrich)              | Cat. no. DUO92008    |
| HeLa                                       | ATCC                                                 | Cat. no. CCL-2       |
| 293FT Packaging Cells                      | Thermo Fisher Scientific                             | Cat. no. R70007      |
| Phoenix Packaging Cells                    | ATCC                                                 | Cat. no. CRL-3213    |
| Ad-Cre-GFP Adenovirus                      | Vector Laboratories                                  | Cat. no. 1700        |
| Ad-GFP Adenovirus                          | Vector Laboratories                                  | Cat. no. 1060        |
| Rosetta (DE3) Competent Cells              | EMD Millipore                                        | Cat. no. 70954       |

WB, Western blot; IP, immunoprecipitation; IF, immunofluorescence.

## References

Zhang, B., C. Liu, W. Qian, Y. Han, X. Li, and J. Deng. 2014. Structure of the unique SEFIR domain from human interleukin 17 receptor A reveals a composite ligand-binding site containing a conserved  $\alpha$ -helix for Act1 binding and IL-17 signaling. *Acta Crystallogr. D Biol. Crystallogr.* 70:1476–1483. <https://doi.org/10.1107/S1399000471400527>
